# Supplementary material for: Effects of intra-articular SHINBARO treatment on monosodium iodoacetate-induced osteoarthritis in rats
Source: Chin Med. 2016 Apr 11;11:17. doi: 10.1186/s13020-016-0089-6 (PMC4827221; doi:10.1186/s13020-016-0089-6)
Supplement: Supplementary file 2 — 10.1186/s13020-016-0089-6 Animal care and use guidelines. [file 13020_2016_89_MOESM2_ESM.pdf]

# ANIMAL STUDY PROPOSAL

1. Submission date : 10. 09. 2012.

2. Principal Investigator

| College and Department                      | Title              | Name             | Professor        | Telephone     | e-mail                    |
|---------------------------------------------|--------------------|------------------|------------------|---------------|---------------------------|
| College : Pharmacy<br>Department : Pharmacy | Ph.D.<br>candidate | Won Kyung<br>Kim | Sang Kook<br>Lee | 010-6434-6764 | dnjsrud6764<br>@naver.com |

3. Initial / Renewal / Modification Submission

|          | Initial<br>submission | Already approved |                 |                    |
|----------|-----------------------|------------------|-----------------|--------------------|
|          |                       | Approval number  | Expiration Date | Reason for renewal |
| Check(✓) | ✓                     |                  |                 |                    |

4. Information of Investigators

| Name          | Title  | Telephone     | e-mail              | SOP training number <sup>1)</sup> |
|---------------|--------|---------------|---------------------|-----------------------------------|
| Hwa Jin Jeong | Ph. D. | 010-4745-8615 | badduck@hanmail.net | ILAR-10-04-009                    |

---

1) Check only if you get the training number of SOP.

## 5. Animal use

|                  |                                                                                                                                                                                                                                                                                                                                                                                                                                                                                                                                                                                                                           |
|------------------|---------------------------------------------------------------------------------------------------------------------------------------------------------------------------------------------------------------------------------------------------------------------------------------------------------------------------------------------------------------------------------------------------------------------------------------------------------------------------------------------------------------------------------------------------------------------------------------------------------------------------|
| Project title    | Study on effect of SHINBARO acupuncture on monosodium iodoacetate-induced osteoarthritis in rat                                                                                                                                                                                                                                                                                                                                                                                                                                                                                                                           |
| Study objectives | To investigate the anti-osteoarthritic effects of SHINBARO acupuncture in monosodium iodoacetate-induced osteoarthritis                                                                                                                                                                                                                                                                                                                                                                                                                                                                                                   |
| Expected results | The intra-articular administration of SHINBARO is expected to heal the monosodium iodoacetate-induced osteoarthritis in dose-dependent manner                                                                                                                                                                                                                                                                                                                                                                                                                                                                             |
| Outline of study | <p>1. Monosodium iodoacetate-induced osteoarthritis rat model</p> <ul style="list-style-type: none"><li>- a single intra-articular injection of 2.5 mg monosodium iodoacetate into the infrapatellar ligament of the right knee</li></ul> <p>2. Treatment</p> <ul style="list-style-type: none"><li>- intra-articular administration of SHINBARO (IAS, 2, 10, and 20 mg/kg) or oral administration of SHINBARO (OS, 20 and 200 mg/kg) or oral administration of diclofenac, positive control (5 mg/kg)</li><li>- (n=6)*( Control, Vehicle, positive control, IAS 3 groups, OS 2 groups)</li></ul> <p>3. ex vivo study</p> |

## 6. Rationale for animal use

|                                                     |                                                                                                                                                                                                                                                                                                                                                                                                                       |
|-----------------------------------------------------|-----------------------------------------------------------------------------------------------------------------------------------------------------------------------------------------------------------------------------------------------------------------------------------------------------------------------------------------------------------------------------------------------------------------------|
| Rationale for animal use                            | SHINBARO has been used as traditional medicines for treatment of several inflammatory disorder and bone disease. But its underlying mechanisms of action remain to be elucidated. In this lab, in vivo osteoarthritis rat model had been already established. Basic data from this study which investigates the anti-osteoarthritic activity of SHINBARO acupuncture could be used as the evidence of clinical trial. |
| Appropriateness of the species selected             | The monosodium iodoacetate-induced osteoarthritis rat model is known to be similar to human degenerative arthritis and the deterioration of trabecular microarchitecture is clear in this model. Therefore, the articular injection of monosodium iodoacetate into rats is appropriate to evaluate anti-osteoarthritic activity of SHINBARO acupuncture.                                                              |
| Appropriateness of the number of animals to be used | The number of animals to be used (n=6) is appropriate to provide data for a more accurate assessment and to be the greatest extent possible consistent with sound scientific and statistical standards.                                                                                                                                                                                                               |

## 7. Animal Requirements

|                                         |                                                  |                                                                         |                                                  |
|-----------------------------------------|--------------------------------------------------|-------------------------------------------------------------------------|--------------------------------------------------|
| Genus                                   | Rat                                              | Species                                                                 | Norvegicus                                       |
| Strain, subspecies, or breed            | SD                                               | Common name                                                             | White laboratory rat                             |
| Age                                     | Weight                                           | Size                                                                    | Sex (check)                                      |
| 6 weeks old                             | 200 g                                            | 10-12 cm                                                                | ✓♂/♀                                             |
| Bacteriological status (Check)          |                                                  |                                                                         |                                                  |
| Germfree                                | Gnotobiote                                       | ✓ SPF                                                                   | Conventional                                     |
| Source(s) (Telephone)                   | Chung-Ang laboratory animal<br>(+82-2-3461-5255) | Transporter (Telephone)                                                 | Chung-Ang laboratory animal<br>(+82-2-3461-5255) |
| Number of Animals to be used            |                                                  |                                                                         |                                                  |
| Year 1                                  | 48                                               | Year 2                                                                  |                                                  |
| Year 3                                  |                                                  | Total                                                                   | 48                                               |
| Primary housing location(s) (Telephone) |                                                  | Institute of laboratory animal Seoul National Univ.<br>(+82-2-880-5334) |                                                  |

## 8. Description of Experimental Design and Animal procedures

### 1) Schedule

|                                                        |                       |                 |                     |
|--------------------------------------------------------|-----------------------|-----------------|---------------------|
| Location where manipulation will be conducted          | The date of beginning | The date of end | Experimental period |
| Institute of laboratory animal<br>Seoul National Univ. | 2012-09-24            | 2012-10-24      | 30 days             |

### 2) Bio-safety Level (Check (✓))

|       |      |       |        |       |
|-------|------|-------|--------|-------|
| Grade | BS I | BS II | BS III | BS IV |
| Check |      |       |        |       |

### 3) Animal Experimental Procedures

|                                             |                                                                                                                                                                                                                   |                                                                                                                             |                                  |
|---------------------------------------------|-------------------------------------------------------------------------------------------------------------------------------------------------------------------------------------------------------------------|-----------------------------------------------------------------------------------------------------------------------------|----------------------------------|
| Restraint                                   | Method                                                                                                                                                                                                            | by hands                                                                                                                    |                                  |
|                                             | The number of restraint                                                                                                                                                                                           | once daily                                                                                                                  |                                  |
|                                             | The necessary time in restraining once                                                                                                                                                                            | within 1 minute                                                                                                             |                                  |
| Animal identification methods <sup>2)</sup> | Ear tags                                                                                                                                                                                                          |                                                                                                                             |                                  |
| Stress <sup>3)</sup>                        | None                                                                                                                                                                                                              |                                                                                                                             |                                  |
| Experimental injections or inoculations     | Infectious agents, adjuvant                                                                                                                                                                                       | SHINBARO acupuncture, diclofenac (in 0.9 % normal saline)                                                                   |                                  |
|                                             | Route ,volume, substances                                                                                                                                                                                         | 1) intra-articular, 0.02 ml, SHINBARO<br>2) p.o., 0.2 ml, SHINBARO<br>3) p.o., 0.2 ml, diclofenac                           |                                  |
|                                             | Schedules                                                                                                                                                                                                         | once daily                                                                                                                  |                                  |
| Sampling                                    | Type                                                                                                                                                                                                              | 1) articular tissue<br>2) blood                                                                                             |                                  |
|                                             | Volume, frequency                                                                                                                                                                                                 | 1) 10 mg, once<br>2) 5 ml, once                                                                                             |                                  |
|                                             | Methodology and point                                                                                                                                                                                             | The animals will be sacrificed and femur bones for tissue analysis and blood samples for serum isolation will be collected. |                                  |
| Surgical procedures                         | None                                                                                                                                                                                                              | Survival surgical procedures                                                                                                | Non-survival surgical procedures |
|                                             | √                                                                                                                                                                                                                 |                                                                                                                             |                                  |
| Veterinary care                             | If animals suffer from diseases in procedure, they will get treatment from expert or be sacrificed in emergency.                                                                                                  |                                                                                                                             |                                  |
| Experimental endpoint criteria              | Sacrifice of animals will be determined by experimental endpoint criteria. But if body weights of animals are decreased by sample toxicity or skin conditions are deteriorated, they will be sacrificed directly. |                                                                                                                             |                                  |

2) e.g., ear tags, tattoos, collar, cage card, implant

3) e.g., food or water deprivation, noxious stimuli, environmental stress

#### 4) Hazardous agents<sup>4)</sup>

| Hazardous agent              | × | ○ | Date of Biosafety Approval <sup>5)</sup> | The name of the agents | Route & dose | Tracking # |
|------------------------------|---|---|------------------------------------------|------------------------|--------------|------------|
| Radionuclides                | ✓ |   |                                          |                        |              |            |
| Biological agents            | ✓ |   |                                          |                        |              |            |
| Hazardous Chemicals or Drugs | ✓ |   |                                          |                        |              |            |
| Recombinant DNA              | ✓ |   |                                          |                        |              |            |
| etc.                         | ✓ |   |                                          |                        |              |            |

#### 9. Animal welfare

| The grade of Pain                                    | Species                                                                      | Grade | Number of animals used each year                                                                                                                                                                        |  |  |  |  |
|------------------------------------------------------|------------------------------------------------------------------------------|-------|---------------------------------------------------------------------------------------------------------------------------------------------------------------------------------------------------------|--|--|--|--|
|                                                      |                                                                              | D     | 48                                                                                                                                                                                                      |  |  |  |  |
|                                                      |                                                                              |       |                                                                                                                                                                                                         |  |  |  |  |
| Alternatives <sup>6)</sup>                           | Database references                                                          |       | Institute of laboratory animal resources Seoul National University                                                                                                                                      |  |  |  |  |
|                                                      | The date of the search, keyword                                              |       | September 10, 2012 , monosodium iodoacetate-induced osteoarthritis                                                                                                                                      |  |  |  |  |
|                                                      | Consideration for animal number reduction                                    |       | The number of animals to be used (n=6) is appropriate to provide data for a more accurate assessment and to be the greatest extent possible consistent with sound scientific and statistical standards. |  |  |  |  |
| Anesthesia/ Analgesia/ Tranquilization <sup>7)</sup> | The name of the agents                                                       |       | None                                                                                                                                                                                                    |  |  |  |  |
|                                                      | Route, dose, schedule of administration)                                     |       | None                                                                                                                                                                                                    |  |  |  |  |
| Method of euthanasia                                 | CO <sub>2</sub> inhalation                                                   |       |                                                                                                                                                                                                         |  |  |  |  |
| Disposition of animals                               | request to institute of laboratory animal resource Seoul National University |       |                                                                                                                                                                                                         |  |  |  |  |

4) Use of hazardous agents requires the approval of the institutional Biosafety Office/Committee.

5) Also describe the organization of biosafety approval.

6) If any procedures fall into USDA's Classification D or E

7) If any procedures fall into USDA's Classification D or E

10. IACUC assessment

| Approval NO. | Disapproval reason |
|--------------|--------------------|
| SNU-120904-7 |                    |
